# Supplementary material for: Individualized Systems Medicine Strategy to Tailor Treatments for Patients with Chemorefractory Acute Myeloid Leukemia
Source: Oxford University Press journal article supplement (doi:10.1158/2159-8290.cd-13-0350), 2013-09-21
Supplement: 21598290cd130350-sup-table_s3.xlsx [file 21598290cd130350-sup-table_s3.xlsx]

## Sheet: Supplementary Table S3
Supplementary Table S3: Clinical characteristics of patients at the time of diagnosis and DSRT, and responses of previous therapies
Patient	Sample	Age	Previous malignancies or predisposing conditions	Diagnosis (ICD-O)	Risk class at the time of diagnosis*	Disease state**	Time from diagnosis	FAB	Cytogenetics	Mol. genetics	DSRT	Clinical translation	Therapy
							(months)
250		66	No	Acute monocytic leukemia	Intermediate	Diagnosis	0	M5	Normal	FLT3-ITD, mutated NPM1	No	No	Cytarabine-antracycline based
	250	67		Acute monocytic leukemia		1st relapse	10.3	M5	del(6q), del(10p), monosomy 21	N/A	Yes	No	Azacytidine
252		36	No	Acute monocytic leukemia	Intermediate	Diagnosis	0	M5	Normal	WT1 overexpression	No	No	Cytarabine-antracycline based and clofarabine-based, IL-2/histamine
	252_1	41		Acute monocytic leukemia		3rd relapse, resistant disease	60.3	M5	N/A	WT1 overexpression	Yes	Yes	Dasatinib
	252_2	41		Acute monocytic leukemia		3rd relapse, resistant disease	61.2	M5	N/A	WT1 overexpression	Yes		Dasatinib
	252_3	41		Acute monocytic leukemia		3rd relapse, resistant disease	62.2	M5	N/A	WT1 overexpression	Yes		Dasatinib
	252_5	41		Acute monocytic leukemia		3rd relapse, resistant disease	62.7	M5	N/A	WT1 overexpression	Yes		Dasatinib
393		38	No	Refractory anemia with excess blasts 2	High	Diagnosis	0	N/A	Hypodiploid 41-43. del(5q), monosomy 7,17,18,19 and 20	Not detected	No	No	Cytarabine-antracycline based, HSCT (MUD)
	393_1	39	MDS, chemotherapy	Acute myeloid leukemia with myelodysplastic changes	High	Diagnosis	15.2	N/A	Complex. Previous changes together with unidentified marker chromosomes and abnormalities	N/A	Yes	No	No therapy
	393_3(CD34+)	39		Acute myeloid leukemia with myelodysplastic changes (CD34+ fraction)		Diagnosis	15.6	N/A	N/A	N/A	Yes	Yes	Dasatinib
560		46	No	Acute myeloid leukemia with maturation	Intermediate	Diagnosis	0	M2	Normal	FLT3-ITD	No	No	Cytarabine-antracycline based, HSCT (MUD), radiotherapy
	560_1	57		Acute monocytic leukemia		4th relapse	132.4	M5	N/A	FLT3-ITD	Yes	Yes	Temsirolimus-dasatinib
	560_9	58		Acute monocytic leukemia		6th relapse	141.5	M5	N/A	FLT3-ITD	Yes	Yes	Dasatinib-sunitinib
600	600_0	54	No	Acute monocytic leukemia	Intermediate	Diagnosis	0	M5	Normal	FLT3-ITD	No	No	Cytarabine-antracycline based
	600_1	54		Acute monocytic leukemia		Relapsed, resistant disease after 1st re-induction	3.1	M5	N/A	FLT3-ITD: 0,05%	Yes	No	Plerixafor-clofarabine-lenalidomide-etoposide
	600_2	54		Acute monocytic leukemia		Relapsed, resistant disease after 2nd re-induction	5.1	M5	del(3q), t(12;15)	N/A	Yes	Yes	Dasatinib-sunitinib-temsirolimus
	600_3	54		Acute monocytic leukemia		Relapsed after CRi	7.4	M5	N/A	N/A	Yes	No	No treatment
718		29	No	Acute myeloid leukemia and t(6;9)(p23;q34); DEK-NUP214	High	Diagnosis	0	M2	t(6;9)(p23; q34)	FLT3-ITD	No	No	Cytarabine-antracycline based, HSCT (MUD)
	718	31		Acute myeloid leukemia and t(6;9)(p23;q34); DEK-NUP214		1st relapse	22.8	M2	1/20 cells: t(6;9) (p23;q34)	FLT3-ITD	Yes	Yes	Sorafenib-clofarabine
784	784_0	37	No	Acute myeloid leukemia with t(11;19)(q23;p13.1); MLL-ELL	High	Diagnosis	0	N/A	t(11;19) (q23;p13.1)	FLT3-ITD	No	No	Cytarabine-antracycline based and plerixafor-clofarabine based
	784_1	37		Acute myeloid leukemia with t(11;19)(q23;p13.1); MLL-ELL		Resistant disease	5	N/A	FISH: 100% of mitotic cells MLL-ELL	N/A	Yes	Yes	Dasatinib-sunitinib-temsirolimus
	784_2	37		Acute myeloid leukemia with t(11;19)(q23;p13.1); MLL-ELL		Resistant disease	6.4	N/A	N/A	N/A	Yes	Yes	Cytarabine-etoposide-sunitinib-vinblastine
800		56	Kidney transplant, immunosuppressive therapy	Therapy-related acute myeloid leukemia	High	Diagnosis	1	M2	Hypodiploid 42-45.Del(5q). Monosomy 13, 17 and X. Structural abnormalities: 7,12 and 22p.	Not detected	No	No	Cytarabine-antracycline based
	800	56		Therapy-related acute myeloid leukemia		Resistant disease	1	M2	N/A	N/A	Yes	Yes	Clofarabine-dasatinib-vinblastine
1064	1064	37	DLBCL Stage IVB (lymfadenopatia, extranodal manifestations), chemotherapy	Therapy-related acute myeloid leukemia	Intermediate	Diagnosis		N/A	abnl(3)	Not detected	Yes	No	Cytarabine-antracycline based
1145	1145_1	41	T-ALL (leukemia and mediastinal tumor), chemotherapy and radiotherapy	Therapy-related myelodysplastic syndrome (RAEB 2)	High	Diagnosis	0.5		Hypodiploid 43. del(5q), del(7q), t(5;6), t(7;9). Monosomy 19, 20 and y	Not detected	Yes	No	Plerixafor-cytarabine-clofarabine, HSCT (MUD), azacytidine
	1145_3	43	Previous and therapy-related myelodysplastic syndrome, HSCT	Therapy-related acute myeloid leukemia	High	1st relapse, resistant disease	15.5	N/A	Hypodiploid 45.del(5q). Trisomy 3. Monosomy 7 and 9.	N/A	Yes	Yes	Ruxolitinib-dexamethasone
	1145_6(PB)	43		Therapy-related acute myeloid leukemia		1st relapse, resistant disease	16.8	N/A	N/A	N/A	Yes	No
1280		65	No	Acute myeloid leukemia with myelodysplastic changes	Intermediate	Diagnosis	0	M2	Trisomy 8	Not detected	No	No	Cytarabine-antracycline based, azacytidine
	1280	66		Acute myeloid leukemia with myelodysplastic changes	Intermediate	1st relapse, resistant disease	16	M2	N/A	N/A	Yes	No	No treatment
1497	1497	35	No	Acute myeloid leukemia and t(8;21)(q22;q21);RUNX1-RUNX1T1	Low	Diagnosis	0	M2	t(8;21)	c-KIT mutation c.2446G>C	Yes	No	Cytarabine-antracycline based
1690	1690	63	No	Acute myeloid leukemia without maturation	Intermediate	Diagnosis	0	M1	Normal	FLT3-ITD, mutated NPM1	Yes	No	Cytarabine-antracycline based
1867	1867	70	No	Acute myeloid leukemia with t(6;11)(q27;q23); MLLT4-MLL	High	Diagnosis	0	M5	Hyperdiploid, 53. Trisomy 4,6,8,9,10,18,19. t(6;11)(q27;q23); MLLT4-MLL	N/A	Yes	No	No treatment
1993	1993	51	No	Acute myeloid leukemia with maturation	High	Diagnosis	0	M2	Hypodiploid 40-42. abnl (1), del(5q), del(7q). Monosomy 9,12,13,14,16, 20.	Not detected	Yes	No	Cytarabine-antracycline based
2080	2080	70	Waldestöm's macroglobulinemia, chemotherapy	Therapy-related acute myeloid leukemia	High	Diagnosis	0	M5	Hyperiploid, 50. Pentasomia 8.	NPM1	Yes	No	Cytarabine-antracycline based
2095	2095	66	No	Acute myeloid leukemia without maturation	Intermediate	Diagnosis	0	M1	del(7q)	Not detected	Yes	No	Cytarabine-antracycline based
4701001		68	No	Acute myeloid leukemia without maturation	High	Diagnosis	0	M1	Normal	FLT3-ITD	No	No	Cytarabine-antracycline-based, elacytarabine, valproatic acid, ATRA, hydroxurea, mercaptopurine
	4701001	69		Acute myeloid leukemia without maturation		1st relapse, resistant disease	15	M1	del6, del7, t(11;18), t(3;15)	FLT3-ITD	Yes	No
